# Supplementary material for: Selective sorting and destruction of mitochondrial membrane proteins in aged yeast
Source: eLife. 2016 Apr 20;5:e13943. doi: 10.7554/eLife.13943 (PMC4889329; doi:10.7554/eLife.13943)
Supplement: Supplementary file 1. — DOI: http://dx.doi.org/10.7554/eLife.13943.019 [file elife-13943-supp1.xlsx]

## Sheet: Sheet1
Supplementary File 1. Complete Results of MDC Substrate Screen
ORF	Gene Name	Screened?	Detectable?	In MDC?	Delivered to Vacuole?
YPR155C	NCA2	yes	yes	yes	yes
YML086C	ALO1	yes	yes	yes	yes
YPL072W	UBP16	yes	yes	yes	yes
YDR219C	MFB1	yes	yes	yes	yes
YKL027W	TCD2	yes	yes	yes	yes
YHR003C	TCD1	yes	yes	yes	yes
YGR012W	MCY1	yes	yes	yes	yes
YOR228C	MCP1	yes	yes	yes	yes
YBL057C	PTH2	yes	yes	yes	yes
YGR049W	SCM4	yes	yes	yes	yes
YBR230C	OM14	yes	yes	yes	yes
YMR059W	SEN15	yes	yes	yes	yes
YPR098C		yes	yes	yes	yes
YLR390W	ECM19	yes	yes	yes	yes
YML007C-A		yes	yes	yes	yes
YNL121C	TOM70	yes	yes	yes	yes
YHR117W	TOM71	yes	yes	yes	yes
YKL120W	OAC1	yes	yes	yes	yes
YGR257C	MTM1	yes	yes	yes	yes
YGR028W	MSP1	yes	yes	yes	yes
YBR104W	YMC2	yes	yes	yes	yes
YMR241W	YHM2	yes	yes	yes	yes
YLR348C	DIC1	yes	yes	yes	yes
YJR077C	MIR1	yes	yes	yes	yes
YMR256C	COX7	yes	yes	yes	yes
YBR291C	CTP1	yes	yes	yes	yes
YKL157W	APE2	yes	yes	no	no
YMR189W	GCV2	yes	yes	no	no
YIL125W	KGD1	yes	yes	no	no
YDR430C	CYM1	yes	yes	no	no
YGR150C		yes	yes	no	no
YNL256W	FOL1	yes	yes	no	no
YAL056W	GPB2	yes	yes	no	no
YER069W	ARG5,6	yes	yes	no	no
YJL200C		yes	yes	no	no
YDR258C	HSP78	yes	yes	no	no
YDL164C	CDC9	yes	yes	no	no
YOR354C	MSC6	yes	yes	no	no
YDR234W	LYS4	yes	yes	no	no
YLR369W	SSQ1	yes	yes	no	no
YDR194C	MSS116	yes	yes	no	no
YMR108W	ILV2	yes	yes	no	no
YKL029C	MAE1	yes	yes	no	no
YOR356W		yes	yes	no	no
YER080W		yes	yes	no	no
YGL107C	RMD9	yes	yes	no	no
YOR108W	LEU9	yes	yes	no	no
YNL104C	LEU4	yes	yes	no	no
YJR016C	ILV3	yes	yes	no	no
YGR171C	MSM1	yes	yes	no	no
YHR037W	PUT2	yes	yes	no	no
YOL027C	MDM38	yes	yes	no	no
YER086W	ILV1	yes	yes	no	no
YBR263W	SHM1	yes	yes	no	no
YMR145C	NDE1	yes	yes	no	no
YBL015W	ACH1	yes	yes	no	no
YDL178W	DLD2	yes	yes	no	no
YDR061W		yes	yes	no	no
YDR232W	HEM1	yes	yes	no	no
YJR003C		yes	yes	no	no
YGL119W	ABC1	yes	yes	no	no
YER073W	ALD5	yes	yes	no	no
YEL052W	AFG1	yes	yes	no	no
YOR374W	ALD4	yes	yes	no	no
YML120C	NDI1	yes	yes	no	no
YBR227C	MCX1	yes	yes	no	no
YDR036C	EHD3	yes	yes	no	no
YNL071W	LAT1	yes	yes	no	no
YPL097W	MSY1	yes	yes	no	no
YER141W	COX15	yes	yes	no	no
YHR024C	MAS2	yes	yes	no	no
YCL017C	NFS1	yes	yes	no	no
YFL018C	LPD1	yes	yes	no	no
YPL262W	FUM1	yes	yes	no	no
YNL137C	NAM9	yes	yes	no	no
YGR255C	COQ6	yes	yes	no	no
YNR001C	CIT1	yes	yes	no	no
YGL219C	MDM34	yes	yes	no	no
YHL021C		yes	yes	no	no
YPL063W	TIM50	yes	yes	no	no
YDR316W		yes	yes	no	no
YDR148C	KGD2	yes	yes	no	no
YLR163C	MAS1	yes	yes	no	no
YJR062C	NTA1	yes	yes	no	no
YCR079W		yes	yes	no	no
YDL044C	MTF2	yes	yes	no	no
YPR125W		yes	yes	no	no
YKL106W	AAT1	yes	yes	no	no
YER061C	CEM1	yes	yes	no	no
YGL059W		yes	yes	no	no
YOR187W	TUF1	yes	yes	no	no
YOR221C	MCT1	yes	yes	no	no
YER178W	PDA1	yes	yes	no	no
YMR062C	ECM40	yes	yes	no	no
YOL140W	ARG8	yes	yes	no	no
YGR244C	LSC2	yes	yes	no	no
YLR203C	MSS51	yes	yes	no	no
YCL044C		yes	yes	no	no
YDL066W	IDP1	yes	yes	no	no
YDL033C		yes	yes	no	no
YDR019C	GCV1	yes	yes	no	no
YOR196C	LIP5	yes	yes	no	no
YOR201C	PET56	yes	yes	no	no
YGR193C	PDX1	yes	yes	no	no
YPL188W	POS5	yes	yes	no	no
YGL143C	MRF1	yes	yes	no	no
YGR046W		yes	yes	no	no
YMR024W	MRPL3	yes	yes	no	no
YDR268W	MSW1	yes	yes	no	no
YHL004W	MRP4	yes	yes	no	no
YGR112W	SHY1	yes	yes	no	no
YJR080C		yes	yes	no	no
YIL094C	LYS12	yes	yes	no	no
YOL042W	NGL1	yes	yes	no	no
YNL005C	MRP7	yes	yes	no	no
YMR097C	MTG1	yes	yes	no	no
YKR066C	CCP1	yes	yes	no	no
YCL064C	CHA1	yes	yes	no	no
YMR083W	ADH3	yes	yes	no	no
YOR136W	IDH2	yes	yes	no	no
YDR322W	MRPL35	yes	yes	no	no
YBR221C	PDB1	yes	yes	no	no
YNL037C	IDH1	yes	yes	no	no
YPL118W	MRP51	yes	yes	no	no
YPR004C		yes	yes	no	no
YGR165W	MRPS35	yes	yes	no	no
YOR142W	LSC1	yes	yes	no	no
YGR084C	MRP13	yes	yes	no	no
YNL284C	MRPL10	yes	yes	no	no
YNL315C	ATP11	yes	yes	no	no
YGR231C	PHB2	yes	yes	no	no
YLR439W	MRPL4	yes	yes	no	no
YOR158W	PET123	yes	yes	no	no
YDR347W	MRP1	yes	yes	no	no
YIL077C		yes	yes	no	no
YML025C		yes	yes	no	no
YCL009C	ILV6	yes	yes	no	no
YHR199C		yes	yes	no	no
YBR176W	ECM31	yes	yes	no	no
YDR175C	RSM24	yes	yes	no	no
YBR251W	MRPS5	yes	yes	no	no
YNL177C	MRPL22	yes	yes	no	no
YPR061C		yes	yes	no	no
YML110C	COQ5	yes	yes	no	no
YGR222W	PET54	yes	yes	no	no
YDR116C	MRPL1	yes	yes	no	no
YNL252C	MRPL17	yes	yes	no	no
YHR067W	RMD12	yes	yes	no	no
YLR312W-A	MRPL15	yes	yes	no	no
YKR006C	MRPL13	yes	yes	no	no
YGR021W		yes	yes	no	no
YJR111C		yes	yes	no	no
YLR351C	NIT3	yes	yes	no	no
YGL221C	NIF3	yes	yes	no	no
YGR132C	PHB1	yes	yes	no	no
YGR147C	NAT2	yes	yes	no	no
YLR201C		yes	yes	no	no
YGL085W		yes	yes	no	no
YIL070C	MAM33	yes	yes	no	no
YGR220C	MRPL9	yes	yes	no	no
YJR101W	RSM26	yes	yes	no	no
YKL208W	CBT1	yes	yes	no	no
YLR059C	REX2	yes	yes	no	no
YKL040C	NFU1	yes	yes	no	no
YIL093C	RSM25	yes	yes	no	no
YBL064C	PRX1	yes	yes	no	no
YNL168C		yes	yes	no	no
YDR405W	MRP20	yes	yes	no	no
YNR040W		yes	yes	no	no
YJL066C	MPM1	yes	yes	no	no
YJR113C	RSM7	yes	yes	no	no
YOR004W		yes	yes	no	no
YDL202W	MRPL11	yes	yes	no	no
YPL107W		yes	yes	no	no
YDR538W	PAD1	yes	yes	no	no
YLL027W	ISA1	yes	yes	no	no
YJL096W	MRPL49	yes	yes	no	no
YNL100W		yes	yes	no	no
YGR235C		yes	yes	no	no
YHR008C	SOD2	yes	yes	no	no
YNR018W		yes	yes	no	no
YGR033C		yes	yes	no	no
YDR296W	MHR1	yes	yes	no	no
YJL063C	MRPL8	yes	yes	no	no
YMR188C	MRPS17	yes	yes	no	no
YBL038W	MRPL16	yes	yes	no	no
YHR038W	RRF1	yes	yes	no	no
YNL306W	MRPS18	yes	yes	no	no
YIL113W	SDP1	yes	yes	no	no
YDR231C	COX20	yes	yes	no	no
YIR024C	GIF1	yes	yes	no	no
YBR122C	MRPL36	yes	yes	no	no
YNL310C		yes	yes	no	no
YGL068W		yes	yes	no	no
YMR003W		yes	yes	no	no
YDR041W	RSM10	yes	yes	no	no
YKR065C		yes	yes	no	no
YKR085C	MRPL20	yes	yes	no	no
YOR215C		yes	yes	no	no
YCR003W	MRPL32	yes	yes	no	no
YPR067W	ISA2	yes	yes	no	no
YGR102C		yes	yes	no	no
YMR072W	ABF2	yes	yes	no	no
YAL044C	GCV3	yes	yes	no	no
YGL018C	JAC1	yes	yes	no	no
YDL120W	YFH1	yes	yes	no	no
YML078W	CPR3	yes	yes	no	no
YFR011C		yes	yes	no	no
YBR047W		yes	yes	no	no
YCR046C	IMG1	yes	yes	no	no
YNL185C	MRPL19	yes	yes	no	no
YIL098C	FMC1	yes	yes	no	no
YOR150W	MRPL23	yes	yes	no	no
YOL071W	EMI5	yes	yes	no	no
YJL104W	MIA1	yes	yes	no	no
YCR028C-A	RIM1	yes	yes	no	no
YGR076C	MRPL25	yes	yes	no	no
YOR286W		yes	yes	no	no
YPL135W	ISU1	yes	yes	no	no
YBR120C	CBP6	yes	yes	no	no
YML030W		yes	yes	no	no
YPL059W	GRX5	yes	yes	no	no
YBR269C		yes	yes	no	no
YPR100W	MRPL51	yes	yes	no	no
YGL080W	MPC1	yes	yes	no	no
YGR243W	MPC3	yes	yes	no	no
YNR022C	MRPL50	yes	yes	no	no
YKL167C	MRP49	yes	yes	no	no
YDR462W	MRPL28	yes	yes	no	no
YHR059W	FYV4	yes	yes	no	no
YBR282W	MRPL27	yes	yes	no	no
YHR162W	MCP2	yes	yes	no	no
YCR071C	IMG2	yes	yes	no	no
YKL138C	MRPL31	yes	yes	no	no
YCR083W	TRX3	yes	yes	no	no
YIL051C	MMF1	yes	yes	no	no
YNL081C	SWS2	yes	yes	no	no
YKL192C	ACP1	yes	yes	no	no
YLR295C	ATP14	yes	yes	no	no
YBR268W	MRPL37	yes	yes	no	no
YDR377W	ATP17	yes	yes	no	no
YBR262C		yes	yes	no	no
YFR049W	YMR31	yes	yes	no	no
YNL122C		yes	yes	no	no
YGR215W	RSM27	yes	yes	no	no
YHR001W-A	QCR10	yes	yes	no	no
YER048W-A		yes	yes	no	no
YJL166W	QCR8	yes	yes	no	no
YDR070C		yes	yes	no	no
YDR322C-A	TIM11	yes	yes	no	no
YPL183W-A	GON5	yes	yes	no	no
YDL045W-A	MRP10	yes	yes	no	no
YDL181W	INH1	yes	yes	no	no
YDR379C-A		yes	yes	no	no
YML009C	MRPL39	yes	yes	no	no
YDL130W-A	STF1	yes	yes	no	no
YBL022C	PIM1	yes	yes	no	no
YLR067C	PET309	yes	yes	no	no
YPL270W	MDL2	yes	yes	no	no
YLL001W	DNM1	yes	yes	no	no
YER017C	AFG3	yes	yes	no	no
YMR301C	ATM1	yes	yes	no	no
YPR024W	YME1	yes	yes	no	no
YJL112W	MDV1	yes	yes	no	no
YMR089C	YTA12	yes	yes	no	no
YBL099W	ATP1	yes	yes	no	no
YER014W	HEM14	yes	yes	no	no
YFL016C	MDJ1	yes	yes	no	no
YJR121W	ATP2	yes	yes	no	no
YJL054W	TIM54	yes	yes	no	no
YBL045C	COR1	yes	yes	no	no
YDR376W	ARH1	yes	yes	no	no
YDR375C	BCS1	yes	yes	no	no
YMR177W	MMT1	yes	yes	no	no
YOR266W	PNT1	yes	yes	no	no
YGL129C	RSM23	yes	yes	no	no
YIL022W	TIM44	yes	yes	no	no
YER154W	OXA1	yes	yes	no	no
YPL215W	CBP3	yes	yes	no	no
YOR271C		yes	yes	no	no
YOR176W	HEM15	yes	yes	no	no
YPR191W	QCR2	yes	yes	no	no
YBR037C	SCO1	yes	yes	no	no
YIL114C	POR2	yes	yes	no	no
YLL041C	SDH2	yes	yes	no	no
YBR039W	ATP3	yes	yes	no	no
YOR065W	CYT1	yes	yes	no	no
YBR185C	MBA1	yes	yes	no	no
YPL078C	ATP4	yes	yes	no	no
YNL055C	POR1	yes	yes	no	no
YAL039C	CYC3	yes	yes	no	no
YKL016C	ATP7	yes	yes	no	no
YDR298C	ATP5	yes	yes	no	no
YHR051W	COX6	yes	yes	no	no
YEL024W	RIP1	yes	yes	no	no
YGL187C	COX4	yes	yes	no	no
YNL052W	COX5A	yes	yes	no	no
YNR017W	MAS6	yes	yes	no	no
YGR082W	TOM20	yes	yes	no	no
YGR183C	QCR9	yes	yes	no	no
YML081C-A	ATP18	yes	yes	no	no
YOL077W-A	ATP19	yes	yes	no	no
YPL271W	ATP15	yes	yes	no	no
YDR529C	QCR7	yes	yes	no	no
YMR207C	HFA1	yes	no
YOL004W	SIN3	yes	no
YML091C	RPM2	yes	no
YHR155W		yes	no
YOR330C	MIP1	yes	no
YIL031W	ULP2	yes	no
YBR084W	MIS1	yes	no
YMR287C	MSU1	yes	no
YHR120W	MSH1	yes	no
YPL040C	ISM1	yes	no
YMR066W	SOV1	yes	no
YLR382C	NAM2	yes	no
YJL102W	MEF2	yes	no
YLR069C	MEF1	yes	no
YKL134C	OCT1	yes	no
YBR001C	NTH2	yes	no
YLR072W		yes	no
YOL023W	IFM1	yes	no
YOR350C	MNE1	yes	no
YKR036C	CAF4	yes	no
YER077C		yes	no
YPL104W	MSD1	yes	no
YJL209W	CBP1	yes	no
YHL038C	CBP2	yes	no
YOR147W	MDM32	yes	no
YIL155C	GUT2	yes	no
YKL155C	RSM22	yes	no
YPL005W		yes	no
YMR098C		yes	no
YDL174C	DLD1	yes	no
YLR253W		yes	no
YMR282C	AEP2	yes	no
YJL071W	ARG2	yes	no
YNL073W	MSK1	yes	no
YLR259C	HSP60	yes	no
YOL033W	MSE1	yes	no
YMR064W	AEP1	yes	no
YJR051W	OSM1	yes	no
YER078C		yes	no
YPR002W	PDH1	yes	no
YPL091W	GLR1	yes	no
YPR047W	MSF1	yes	no
YBL098W	BNA4	yes	no
YGL256W	ADH4	yes	no
YPL083C	SEN54	yes	no
YKL194C	MST1	yes	no
YJL060W	BNA3	yes	no
YPL168W		yes	no
YKL195W		yes	no
YJL147C		yes	no
YBR026C	ETR1	yes	no
YDR065W		yes	no
YGR286C	BIO2	yes	no
YLR105C	SEN2	yes	no
YIR021W	MRS1	yes	no
YKL011C	CCE1	yes	no
YGR101W	PCP1	yes	no
YMR267W	PPA2	yes	no
YHR198C		yes	no
YKR087C		yes	no
YLR283W		yes	no
YNL063W		yes	no
YLR091W		yes	no
YKL150W	MCR1	yes	no
YKL055C	OAR1	yes	no
YDR337W	MRPS28	yes	no
YLR290C		yes	no
YGL057C		yes	no
YPR116W		yes	no
YLR132C		yes	no
YOR040W	GLO4	yes	no
YJL043W		yes	no
YBL095W		yes	no
YGR207C		yes	no
YPR134W	MSS18	yes	no
YOR305W		yes	no
YER153C	PET122	yes	no
YDR305C	HNT2	yes	no
YER182W		yes	no
YMR157C		yes	no
YLR168C	MSF1'	yes	no
YBL059W		yes	no
YOR236W	DFR1	yes	no
YFL046W		yes	no
YNL213C		yes	no
YGL211W		yes	no
YIL157C		yes	no
YHR189W	PTH1	yes	no
YAL008W	FUN14	yes	no
YPL252C	YAH1	yes	no
YDR185C		yes	no
YLR193C		yes	no
YJL161W		yes	no
YBL090W	MRP21	yes	no
YLR281C		yes	no
YIL087C		yes	no
YMR252C		yes	no
YDR511W	ACN9	yes	no
YMR225C	MRPL44	yes	no
YKL170W	MRPL38	yes	no
YKR049C		yes	no
YKL003C	MRP17	yes	no
YLR346C		yes	no
YDR079W	PET100	yes	no
YPL013C	MRPS16	yes	no
YDL157C		yes	no
YNL198C		yes	no
YDR115W		yes	no
YDR493W		yes	no
YHL018W		yes	no
YLR204W	QRI5	yes	no
YOL150C		yes	no
YGL226W		yes	no
YMR286W	MRPL33	yes	no
YNL211C		yes	no
YLR395C	COX8	yes	no
YDL067C	COX9	yes	no
YJL062W-A		yes	no
YLR188W	MDL1	yes	no
YOR017W	PET127	yes	no
YLR139C	SLS1	yes	no
YBR179C	FZO1	yes	no
YMR302C	PRP12	yes	no
YMR257C	PET111	yes	no
YBR003W	COQ1	yes	no
YPL172C	COX10	yes	no
YNL083W		yes	no
YAL010C	MDM10	yes	no
YNR045W	PET494	yes	no
YLL006W	MMM1	yes	no
YNL169C	PSD1	yes	no
YOR334W	MRS2	yes	no
YIL136W	OM45	yes	no
YEL006W		yes	no
YMR060C	TOM37	yes	no
YNR041C	COQ2	yes	no
YMR166C		yes	no
YPR011C		yes	no
YOR037W	CYC2	yes	no
YBR085W	AAC3	yes	no
YER053C		yes	no
YGR062C	COX18	yes	no
YPL134C	ODC1	yes	no
YDL119C		yes	no
YOR130C	ORT1	yes	no
YNL003C	PET8	yes	no
YOL096C	COQ3	yes	no
YMR056C	AAC1	yes	no
YKR052C	MRS4	yes	no
YDL142C	CRD1	yes	no
YLR393W	ATP10	yes	no
YOL009C	MDM12	yes	no
YGR096W	TPC1	yes	no
YJL133W	MRS3	yes	no
YOR297C	TIM18	yes	no
YER170W	ADK2	yes	no
YGR174C	CBP4	yes	no
YDR178W	SDH4	yes	no
YNL328C	MDJ2	yes	no
YLR356W		yes	no
YIL111W	COX5B	yes	no
YNL070W	TOM7	yes	no
YPR020W	ATP20	yes	no
YML129C	COX14	yes	no
YOR045W	TOM6	yes	no
YPL029W	SUV3	no
YBR238C		no
YHL032C	GUT1	no
YOR022C		no
YPL222W		no
YDR332W		no
YLR289W	GUF1	no
YBR163W	DEM1	no
YOR205C		no
YDR474C		no
YPR006C	ICL2	no
YGL064C	MRH4	no
YBL080C	PET112	no
YKR016W		no
YMR023C	MSS1	no
YPL109C		no
YMR115W		no
YLR121C	YPS3	no
YJR122W	CAF17	no
YNL239W	LAP3	no
YFR024C-A	LSB3	no
YDL048C	STP4	no
YPR001W	CIT3	no
YCR024C	PMP1	no
YFR044C		no
YDR514C		no
YFL027C	GYP8	no
YLR142W	PUT1	no
YMR293C		no
YLR090W	XDJ1	no
YDR125C	ECM18	no
YHR011W	DIA4	no
YDL027C		no
YNR052C	POP2	no
YHL014C	YLF2	no
YKL162C		no
YPL060W	LPE10	no
YDL104C	QRI7	no
YBL013W	FMT1	no
YOL043C	NTG2	no
YPR140W		no
YDR197W	CBS2	no
YIL042C		no
YKL114C	APN1	no
YKR070W		no
YDL107W	MSS2	no
YJL131C		no
YGR031W		no
YHR083W		no
YHR106W	TRR2	no
YJL208C	NUC1	no
YLR239C	LIP2	no
YDR204W	COQ4	no
YKL085W	MDH1	no
YPL069C	BTS1	no
YGR015C		no
YOR226C	ISU2	no
