# Supplementary material for: Selective sorting and destruction of mitochondrial membrane proteins in aged yeast
Source: eLife. 2016 Apr 20;5:e13943. doi: 10.7554/eLife.13943 (PMC4889329; doi:10.7554/eLife.13943)
Supplement: Supplementary file 2. — DOI: http://dx.doi.org/10.7554/eLife.13943.020 [file elife-13943-supp2.docx]

**Supplementary File 2. Yeast Strains Used in this Study**

| **Strain** | **Genotype** |
| --- | --- |
| UCC11595 | MATa/MAT his31/his31 leu20/leu20 ura30/ura30 lys20/+ trp163/+ ho::PSCW11-cre-EBD78-NatMX/ho::PSCW11-cre-EBD78-NatMX loxP-CDC20-Intron-loxP-HphMX/loxP-CDC20-Intron-loxP-HphMX loxP-UBC9-LOXP-LEU2/loxP-UBC9-LOXP-LEU2 TOM70-eGFP-KanMX/+ VPH1-mCherry-KanMX/+ |
| UCC11621 | MATa/MAT his31/his31 leu20/leu20 ura30/ura30 lys20/+ trp163/+ ho::PSCW11-cre-EBD78-NatMX/ho::PSCW11-cre-EBD78-NatMX loxP-CDC20-Intron-loxP-HphMX/loxP-CDC20-Intron-loxP-HphMX loxP-UBC9-LOXP-LEU2/loxP-UBC9-LOXP-LEU2 TOM70-eGFP-KanMX/+ VPH1-mCherry-KanMX/+ atg5::URA3/atg5::URA3 |
| UCC11613 | MATa/MAT his31/his31 leu20/leu20 ura30/ura30 lys20/+ trp163/+ ho::PSCW11-cre-EBD78-NatMX/ho::PSCW11-cre-EBD78-NatMX loxP-CDC20-Intron-loxP-HphMX/loxP-CDC20-Intron-loxP-HphMX loxP-UBC9-LOXP-LEU2/loxP-UBC9-LOXP-LEU2 TOM70-eGFP-KanMX/+ VPH1-mCherry-KanMX/+ dnm1::URA3/dnm1::URA3 |
| UCC11615 | MATa/MAT his31/his31 leu20/leu20 ura30/ura30 lys20/+ trp163/+ ho::PSCW11-cre-EBD78-NatMX/ho::PSCW11-cre-EBD78-NatMX loxP-CDC20-Intron-loxP-HphMX/loxP-CDC20-Intron-loxP-HphMX loxP-UBC9-LOXP-LEU2/loxP-UBC9-LOXP-LEU2 TOM70-eGFP-KanMX/+ VPH1-mCherry-KanMX/+ atg32::URA3/atg32::URA3 |
| UCC11617 | MATa/MAT his31/his31 leu20/leu20 ura30/ura30 lys20/+ trp163/+ ho::PSCW11-cre-EBD78-NatMX/ho::PSCW11-cre-EBD78-NatMX loxP-CDC20-Intron-loxP-HphMX/loxP-CDC20-Intron-loxP-HphMX loxP-UBC9-LOXP-LEU2/loxP-UBC9-LOXP-LEU2 TOM70-eGFP-KanMX/+ VPH1-mCherry-KanMX/+ vam3::URA3/vam3::URA3 |
| UCC11619 | MATa/MAT his31/his31 leu20/leu20 ura30/ura30 lys20/+ trp163/+ ho::PSCW11-cre-EBD78-NatMX/ho::PSCW11-cre-EBD78-NatMX loxP-CDC20-Intron-loxP-HphMX/loxP-CDC20-Intron-loxP-HphMX loxP-UBC9-LOXP-LEU2/loxP-UBC9-LOXP-LEU2 TOM70-eGFP-KanMX/+ VPH1-mCherry-KanMX/+ pep4::URA3/pep4::URA3 |
| UCC11843 | MATa/MAT his31/his31 leu20/leu20 ura30/ura30 lys20/+ trp163/+ ho::PSCW11-cre-EBD78-NatMX/ho::PSCW11-cre-EBD78-NatMX loxP-CDC20-Intron-loxP-HphMX/loxP-CDC20-Intron-loxP-HphMX loxP-UBC9-LOXP-LEU2/loxP-UBC9-LOXP-LEU2 TOM70-eGFP-KanMX/+ VPH1-mCherry-KanMX/+ pep4::SpHIS5MX/pep4::SpHIS5MX |
| UCC11849 | MATa/MAT his31/his31 leu20/leu20 ura30/ura30 lys20/+ trp163/+ ho::PSCW11-cre-EBD78-NatMX/ho::PSCW11-cre-EBD78-NatMX loxP-CDC20-Intron-loxP-HphMX/loxP-CDC20-Intron-loxP-HphMX loxP-UBC9-LOXP-LEU2/loxP-UBC9-LOXP-LEU2 TOM70-eGFP-KanMX/+ VPH1-mCherry-KanMX/+ pep4::SpHIS5MX/pep4::SpHIS5MX atg5::URA3/atg5::URA3 |
| UCC11845 | MATa/MAT his31/his31 leu20/leu20 ura30/ura30 lys20/+ trp163/+ ho::PSCW11-cre-EBD78-NatMX/ho::PSCW11-cre-EBD78-NatMX loxP-CDC20-Intron-loxP-HphMX/loxP-CDC20-Intron-loxP-HphMX loxP-UBC9-LOXP-LEU2/loxP-UBC9-LOXP-LEU2 TOM70-eGFP-KanMX/+ VPH1-mCherry-KanMX/+ pep4::SpHIS5MX/pep4::SpHIS5MX dnm1::URA3/dnm1::URA3 |
| UCC11847 | MATa/MAT his31/his31 leu20/leu20 ura30/ura30 lys20/+ trp163/+ ho::PSCW11-cre-EBD78-NatMX/ho::PSCW11-cre-EBD78-NatMX loxP-CDC20-Intron-loxP-HphMX/loxP-CDC20-Intron-loxP-HphMX loxP-UBC9-LOXP-LEU2/loxP-UBC9-LOXP-LEU2 TOM70-eGFP-KanMX/+ VPH1-mCherry-KanMX/+ pep4::SpHIS5MX/pep4::SpHIS5MX atg32::URA3/atg32::URA3 |
| UCC4961 | MATa/MAT his31/his31 leu20/leu20 ura30/ura30 lys20/+ trp163/+ ho::PSCW11-cre-EBD78-NatMX/ho::PSCW11-cre-EBD78-NatMX loxP-CDC20-Intron-loxP-HphMX/loxP-CDC20-Intron-loxP-HphMX loxP-UBC9-LOXP-LEU2/loxP-UBC9-LOXP-LEU2 TOM70-mCherry-KanMX/+ |
| UCC4965 | MATa/MAT his31/his31 leu20/leu20 ura30/ura30 lys20/+ trp163/+ ho::PSCW11-cre-EBD78-NatMX/ho::PSCW11-cre-EBD78-NatMX loxP-CDC20-Intron-loxP-HphMX/loxP-CDC20-Intron-loxP-HphMX loxP-UBC9-LOXP-LEU2/loxP-UBC9-LOXP-LEU2 TOM70-mCherry-KanMX/+ TIM50-eGFP-KanMX/+ |
| UCC4935 | MATa/MAT his31/his31 leu20/leu20 ura30/ura30 lys20/+ trp163/+ ho::PSCW11-cre-EBD78-NatMX/ho::PSCW11-cre-EBD78-NatMX loxP-CDC20-Intron-loxP-HphMX/loxP-CDC20-Intron-loxP-HphMX loxP-UBC9-LOXP-LEU2/loxP-UBC9-LOXP-LEU2 TOM70-mCherry-KanMX/+ DNM1-eGFP-KanMX/+ |
| AHY1033 | MATa/MAT his31/his31 leu20/leu20 ura30/ura30 lys20/+ trp163/+ ho::PSCW11-cre-EBD78-NatMX/ho::PSCW11-cre-EBD78-NatMX loxP-CDC20-Intron-loxP-HphMX/loxP-CDC20-Intron-loxP-HphMX loxP-UBC9-LOXP-LEU2/loxP-UBC9-LOXP-LEU2 TOM70-mCherry-KanMX/+ chrI(199456-199457)::PGPD1-eGFP-ATG8-TermCYC1-URA3/chrI(199456-199457)::PGPD1-eGFP-ATG8-TermCYC1-URA3 |
| AHY705 | MATa/MAT his31/his31 leu20/leu20 ura30/ura30 lys20/+ trp163/+ ho::PSCW11-cre-EBD78-NatMX/ho::PSCW11-cre-EBD78-NatMX loxP-CDC20-Intron-loxP-HphMX/loxP-CDC20-Intron-loxP-HphMX loxP-UBC9-LOXP-LEU2/loxP-UBC9-LOXP-LEU2 TOM70-mCherry-KanMX/+ TOM20-eGFP-KanMX/+ |
| UCC11775 | MATa/MAT his31/his31 leu20/leu20 ura30/ura30 lys20/+ met150/+ TermCYC1:URA3-PGPD/TDH3-cre-EBD78:TermCYC1/+ TOM70-V5-loxP-HA-GFP-HphMX-loxP-T7-mRFP-KanMX/+ |
| UCC11785 | MATa/MAT his31/his31 leu20/leu20 ura30/ura30 lys20/+ met150/+ TermCYC1:URA3-PGPD/TDH3-cre-EBD78:TermCYC1/+ OAC1-V5-loxP-HA-GFP-HphMX-loxP-T7-mRFP-KanMX/+ |
| UCC4997 | MAT his31 leu20 ura30 lys20 TOM70-mCherry-KanMX |
| BY4741 | MATa his31 leu20 ura30 met150 |
| AHY1657 | MATa his31 leu20 ura30 met150 tom70::URA3 |
| AHY1665 | MATa his31 leu20 ura30 met150 tom70::URA3 tom71::LEU2 |
| AHY1669 | MATa his31 leu20 ura30 met150 COX7-eGFP-KanMX |
| AHY1671 | MATa his31 leu20 ura30 met150 tom70::URA3 COX7-eGFP-KanMX |
| AHY1676 | MATa his31 leu20 ura30 met150 tom70::URA3 tom71::LEU2 COX7-eGFP-KanMX |
| AHY1683 | MATa his31 leu20 ura30 met150 COX7-eGFP-KanMX dnm1::HpHMX |
| AHY1685 | MATa his31 leu20 ura30 met150 tom70::URA3 COX7-eGFP-KanMX dnm1::HpHMX |
| AHY1687 | MATa his31 leu20 ura30 met150 tom70::URA3 tom71::LEU2 COX7-eGFP-KanMX dnm1::HpHMX |
| AHY689 | MATa/MAT his31/his31 leu20/leu20 ura30/ura30 lys20/+ met150/+ fis1::KanMX/fis1::KanMX TOM70-eGFP-SpHIS5MX/+ |
