# Supplementary figures and images for: Selective sorting and destruction of mitochondrial membrane proteins in aged yeast
Source: eLife journal article supplement (doi:10.7554/elife.13943), 2016-04-20

Figure 2-figure supplement 1

**A**

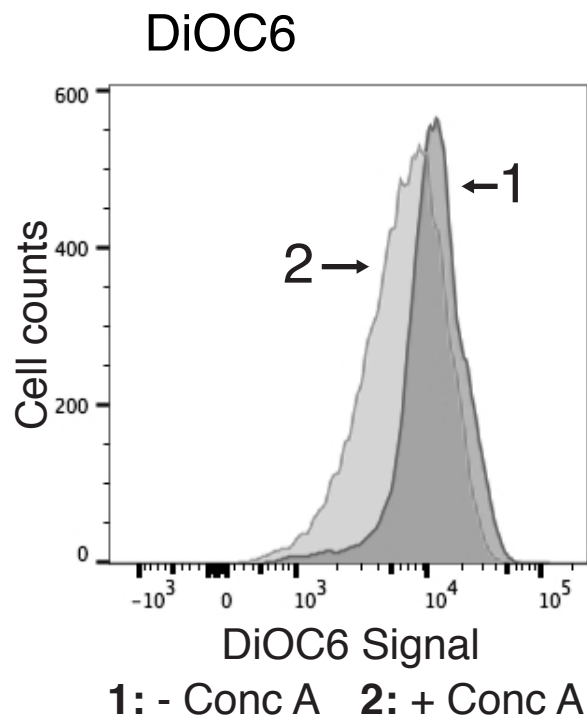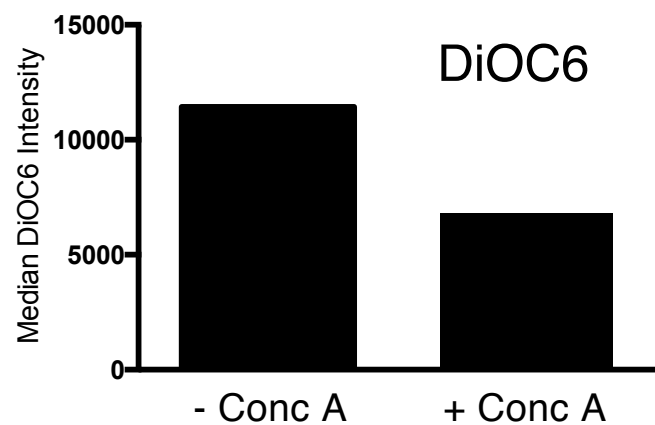

**B**

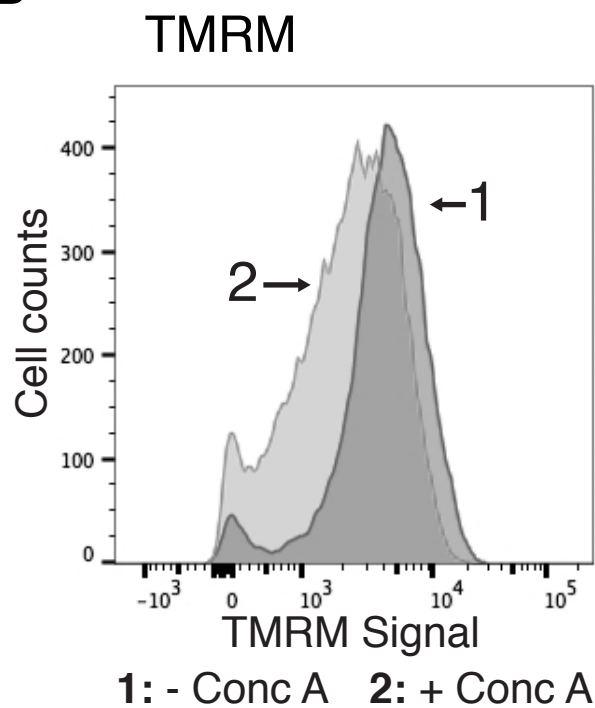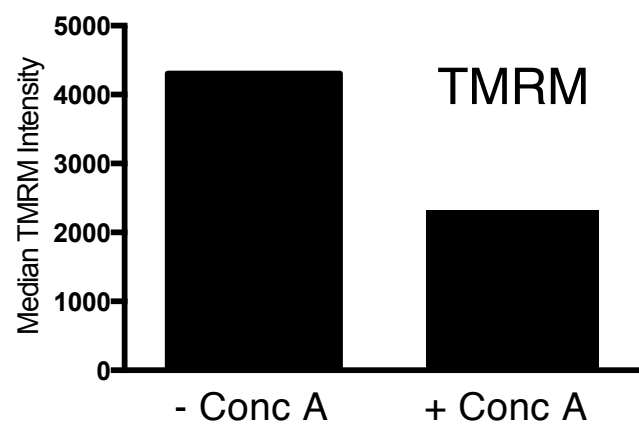

Supplement: supp [file elife_poa_e13943_Figure_2_figure_supplement_1.pdf › elife_poa_e13943_Figure_2_figure_supplement_1.pdf]

Figure 4-figure supplement 1

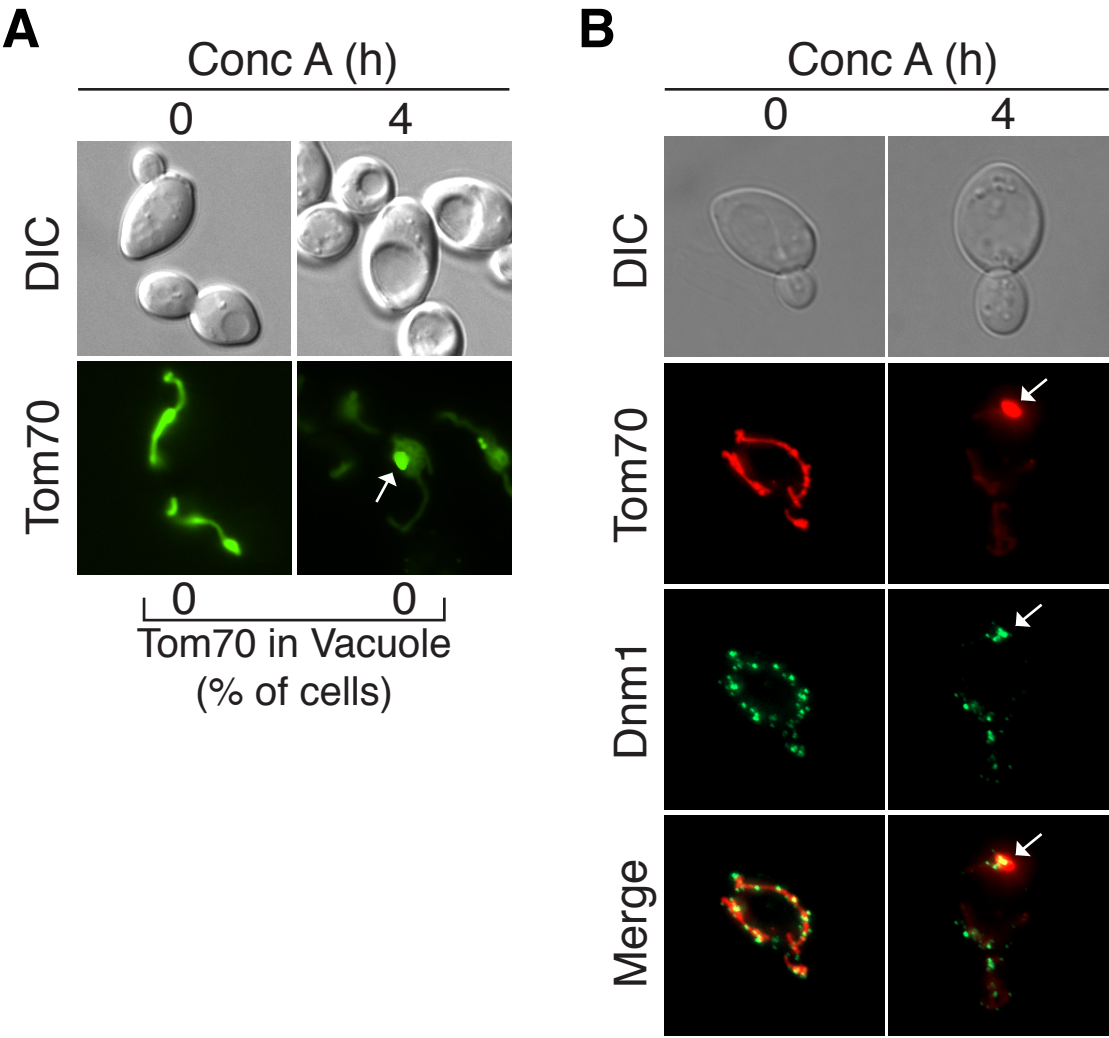

Supplement: supp [file elife_poa_e13943_Figure_4_figure_supplement_1.pdf › elife_poa_e13943_Figure_4_figure_supplement_1.pdf]

Figure 4-figure supplement 2

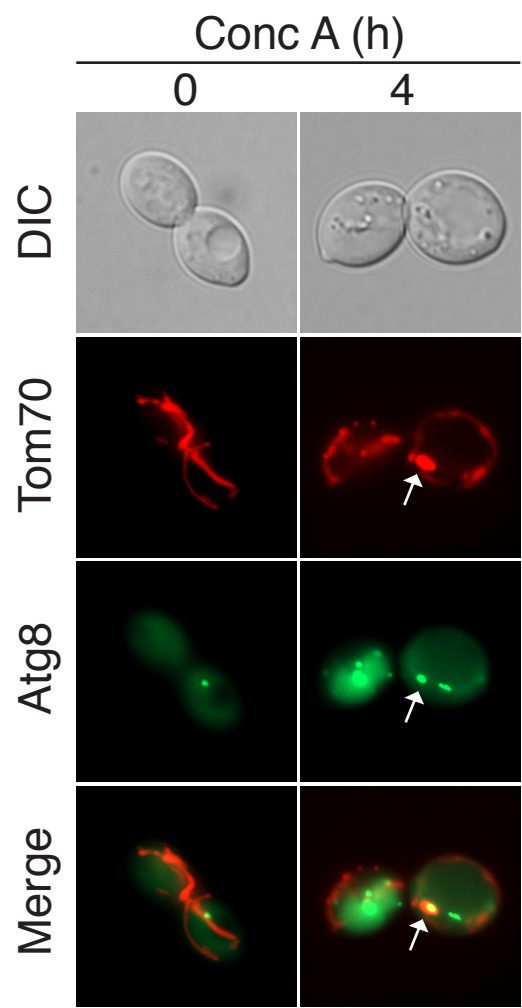

Supplement: supp [file elife_poa_e13943_Figure_4_figure_supplement_2.pdf › elife_poa_e13943_Figure_4_figure_supplement_2.pdf]

Figure 5-figure supplement 1

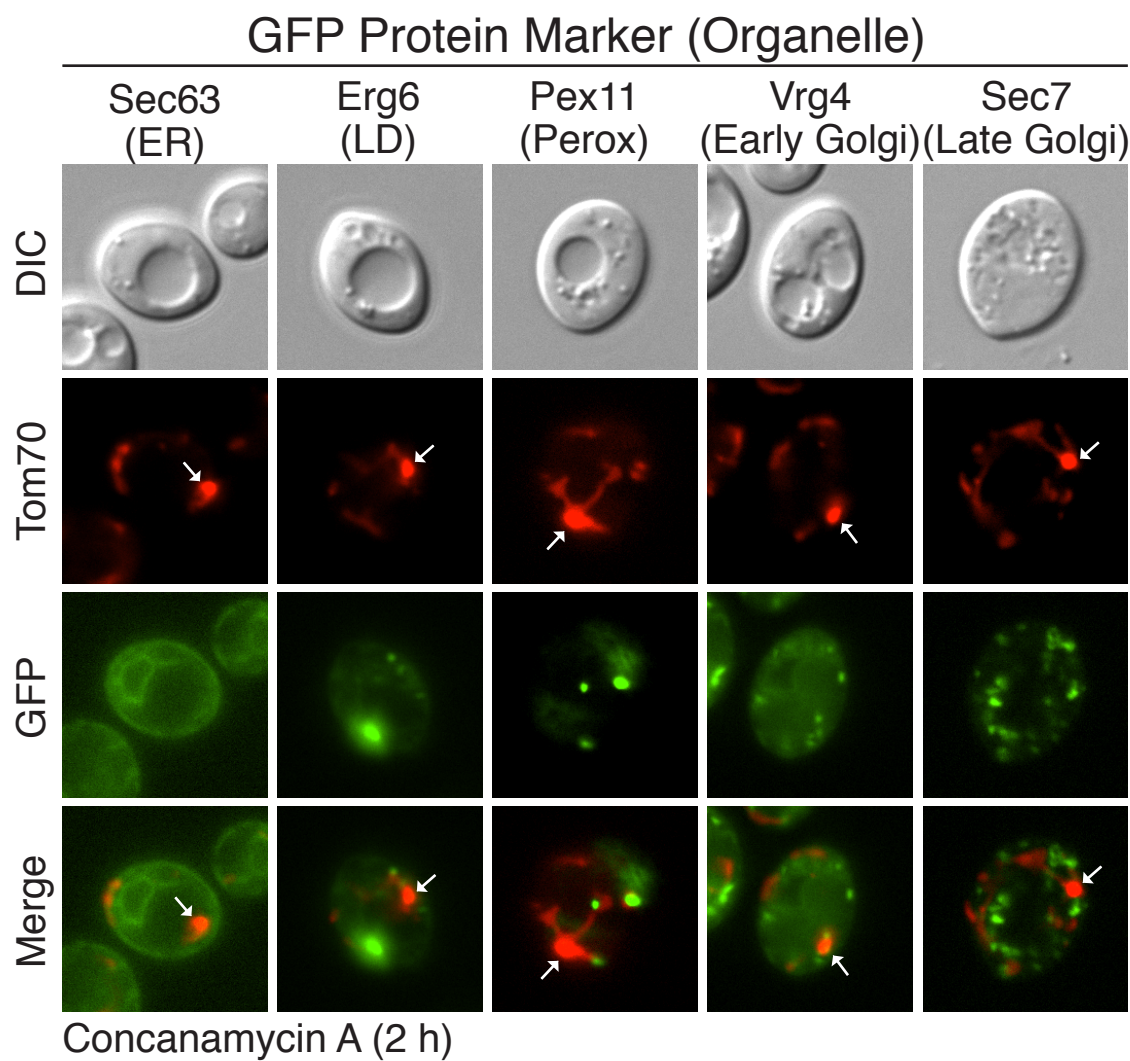

Supplement: supp [file elife_poa_e13943_Figure_5_figure_supplement_1.pdf › elife_poa_e13943_Figure_5_figure_supplement_1.pdf]

Figure 7-figure supplement 1

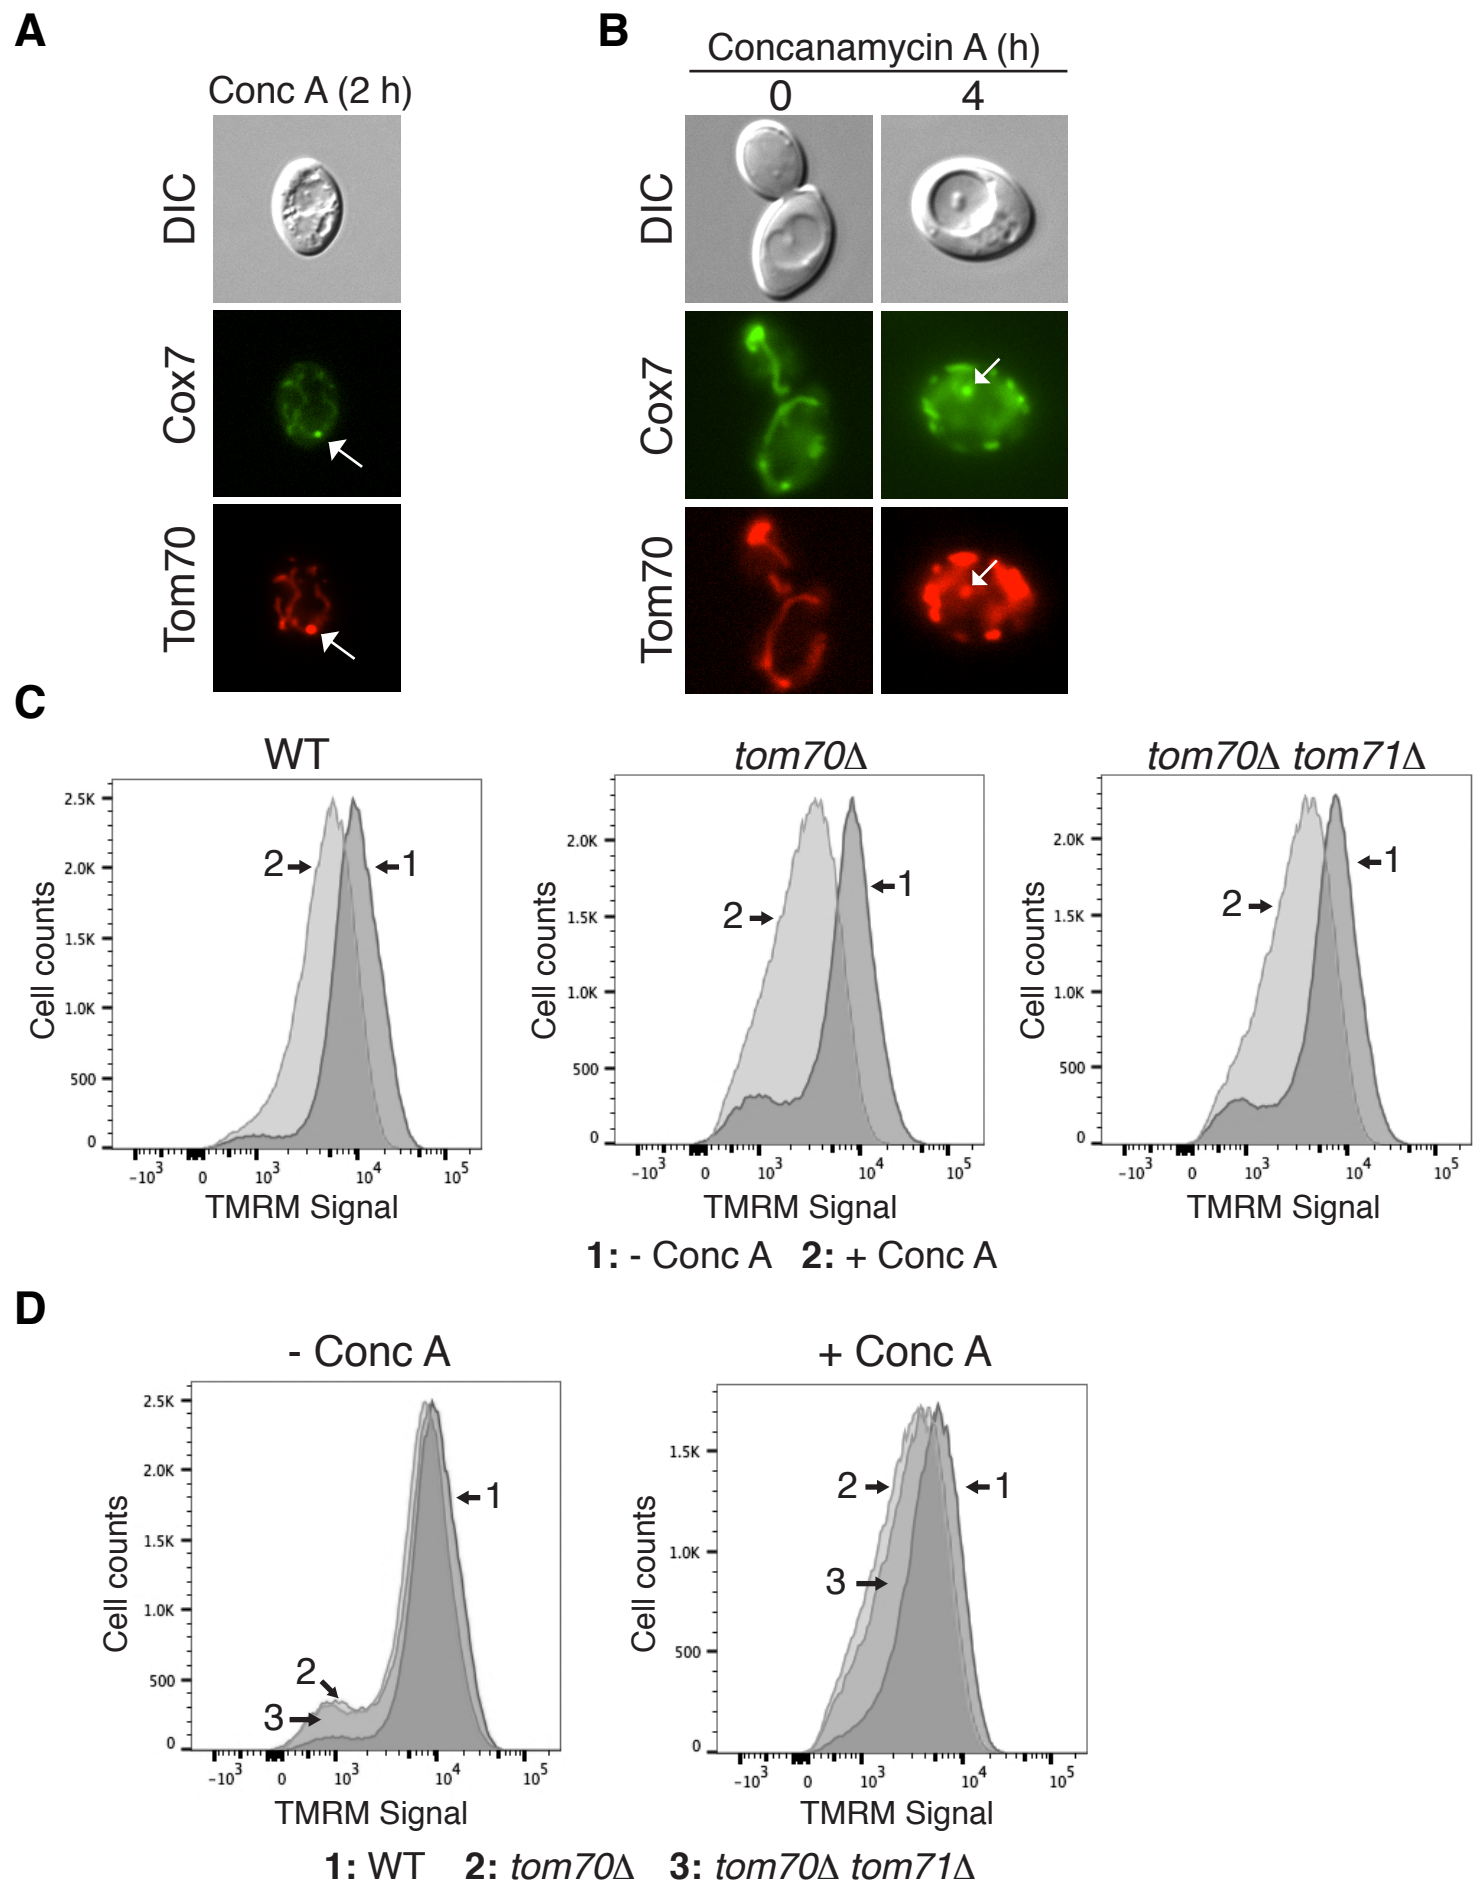

Supplement: supp [file elife_poa_e13943_Figure_7_figure_supplement_1.pdf › elife_poa_e13943_Figure_7_figure_supplement_1.pdf]
